# Supplementary figures and images for: Cognitive Capacity Genome-Wide Polygenic Scores Identify Individuals with Slower Cognitive Decline in Aging
Source: MDPI journal article supplement (doi:10.3390/genes13081320), 2022-07-24

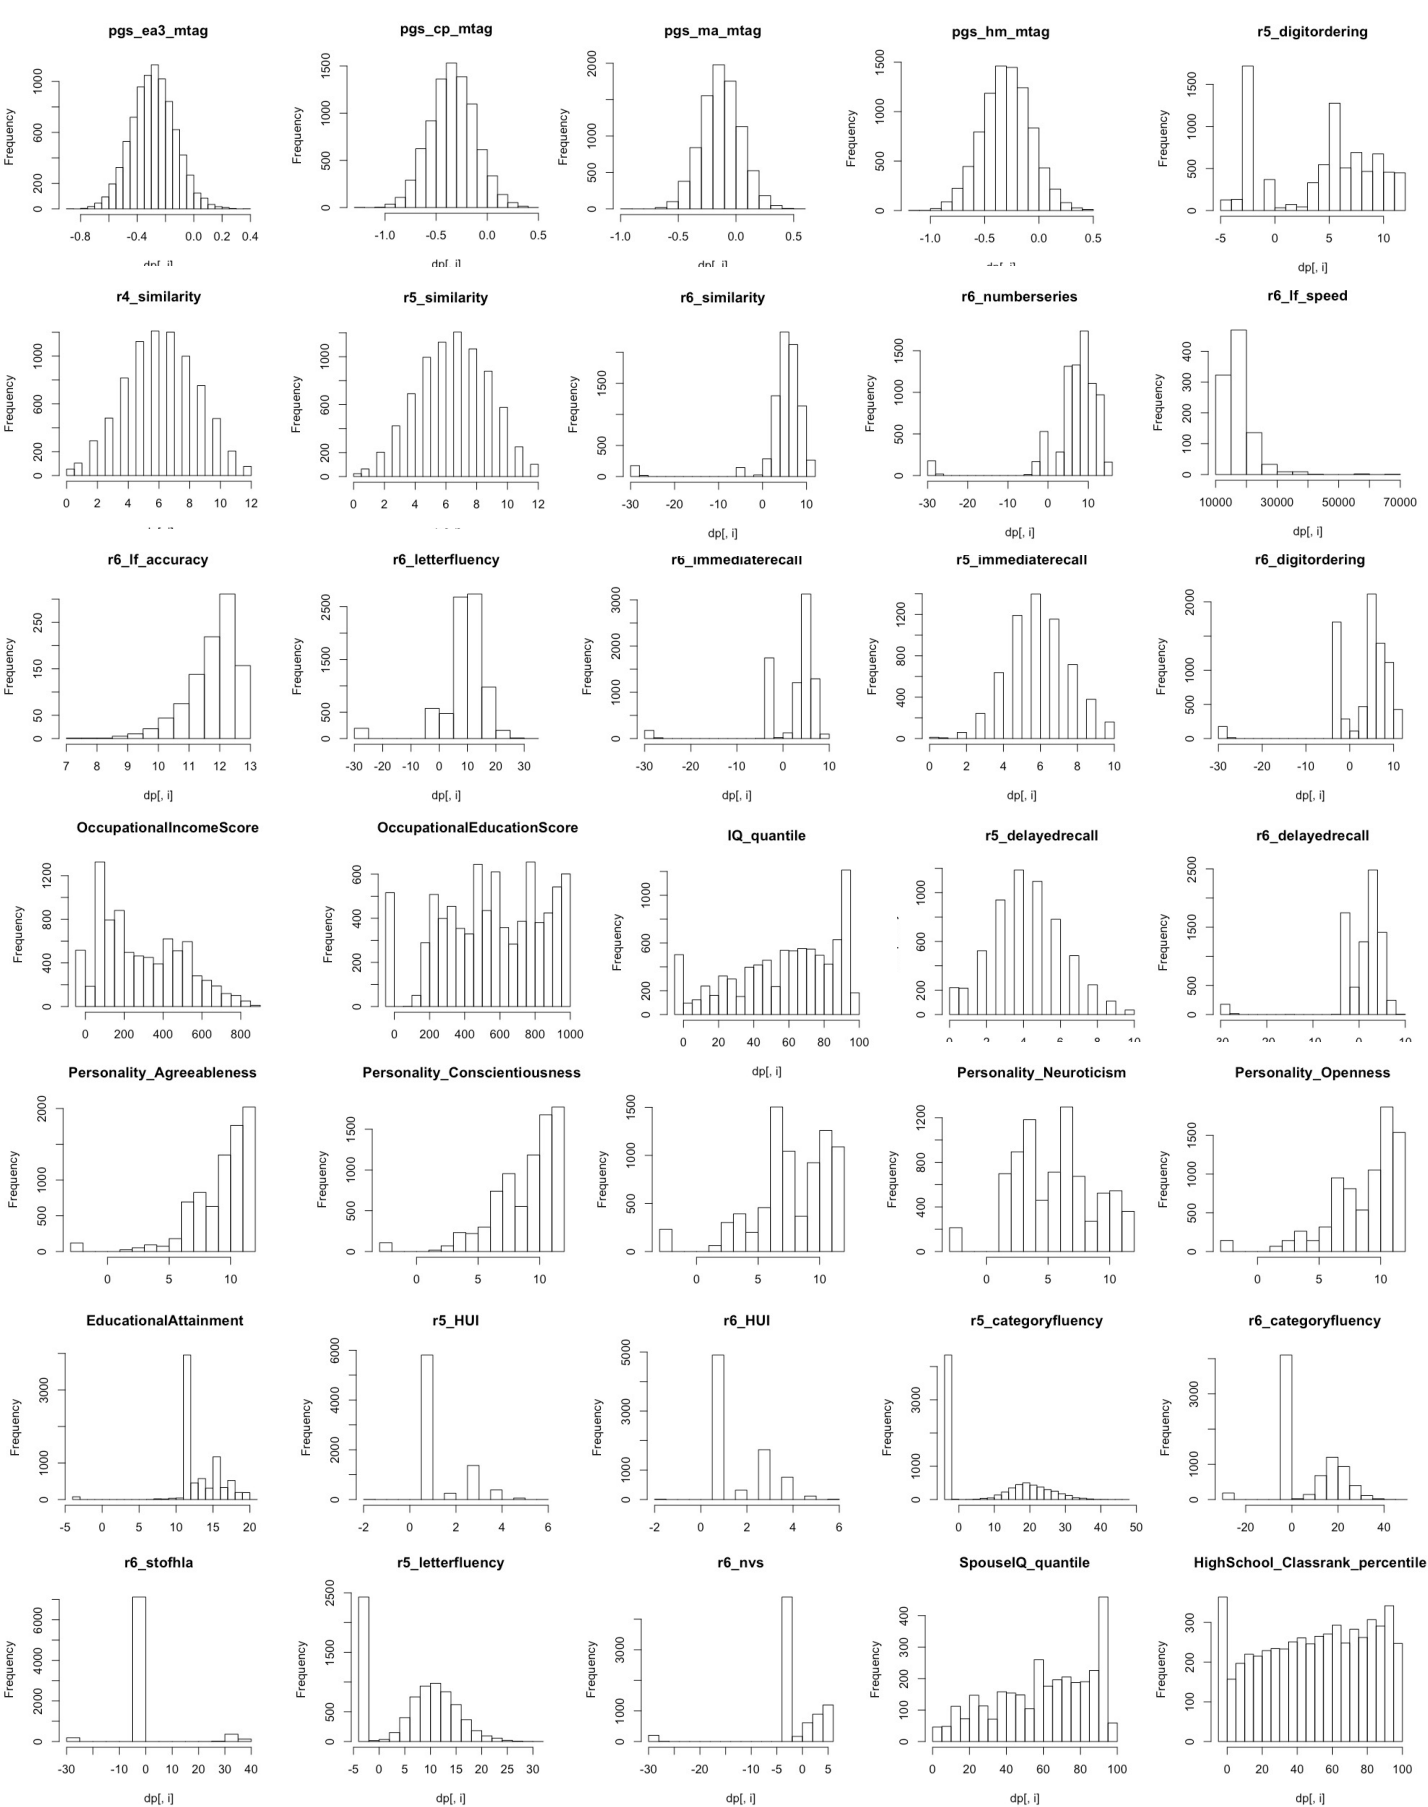

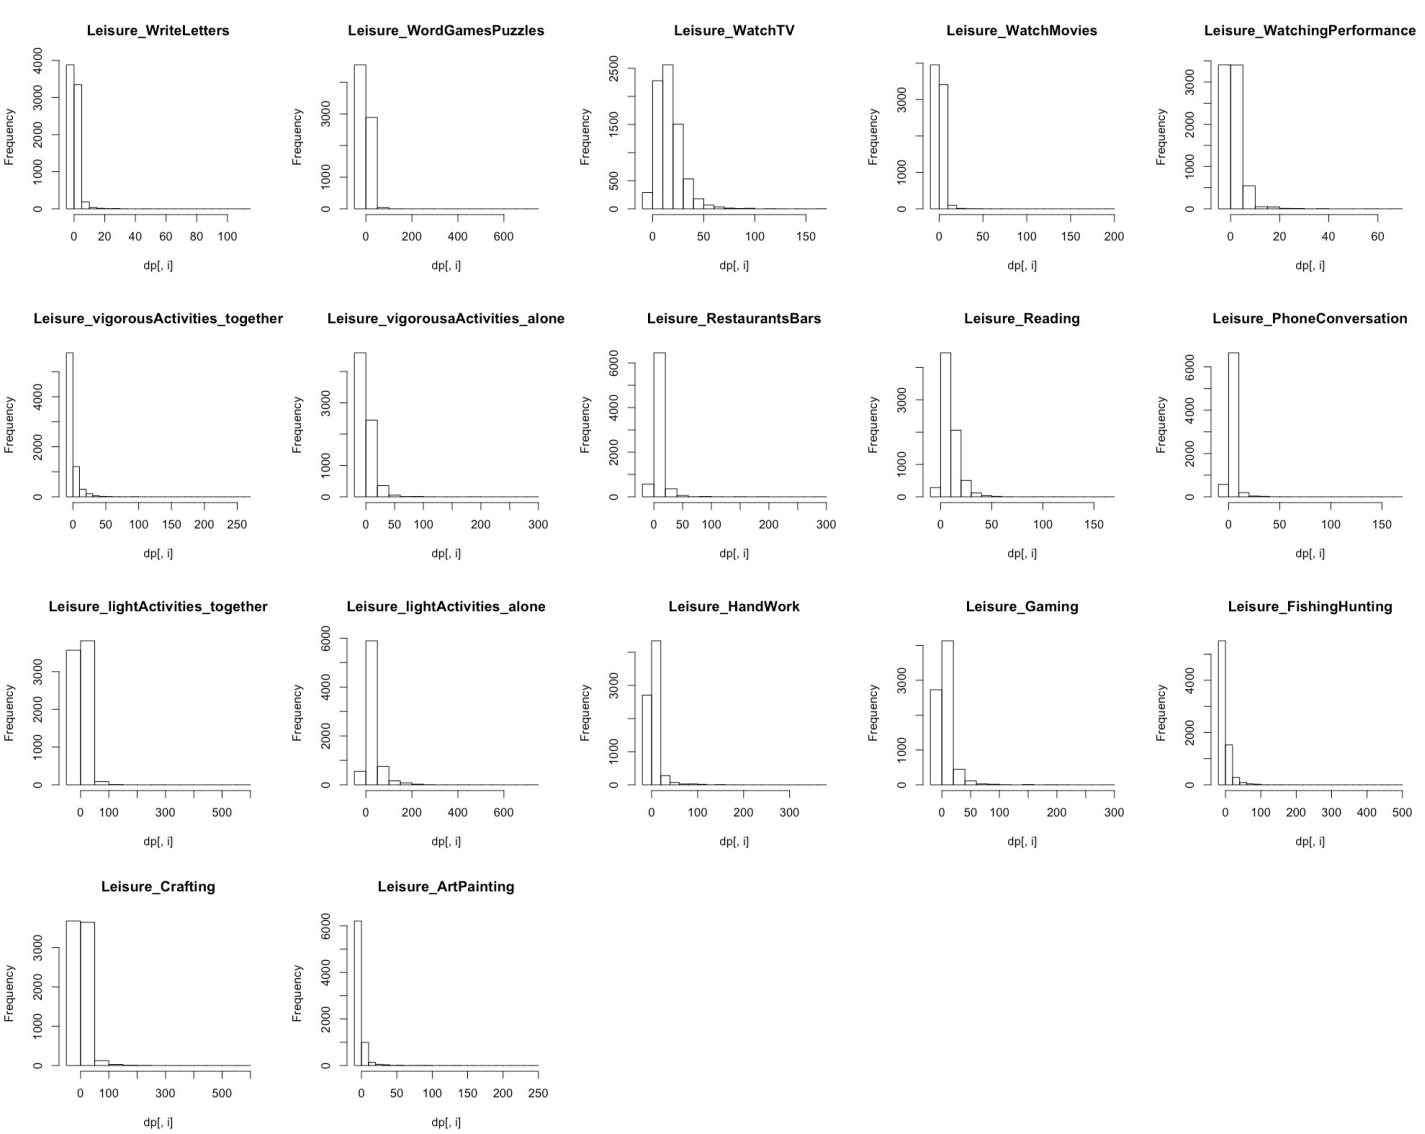

Supplement: s1 [file s1]
